# Supplementary material for: Bioinformatic analysis of genotype by sequencing (GBS) data with NGSEP
Source: PubMed Central journal article supplement (PMC5009557; doi:10.1186/s12864-016-2827-7), 2016-08-31

**Supplementary figure 1.** Number of genotype calls and number of errors for different quality scores on the datasets obtained from the analysis of the cassava K family population. All values in the Y axis are thousands of genotype calls

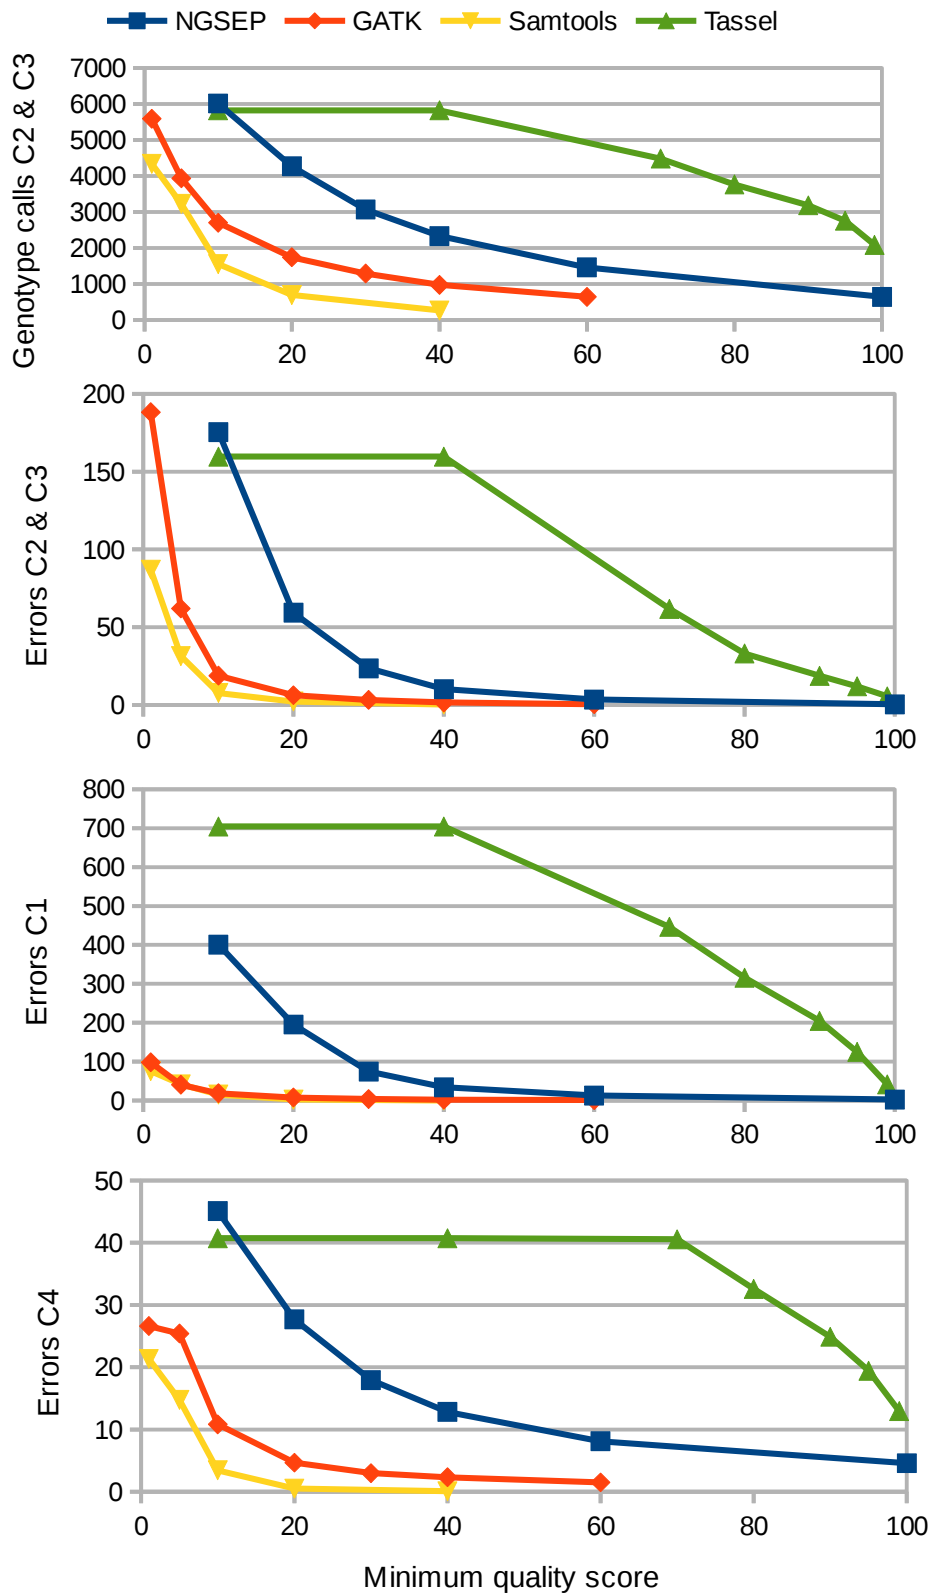

**Supplementary figure 2.** Dot plot of predicted genomic sites in the latest cassava reference genome (v6.1) for the SNPs organized in the 18 linkage groups obtained after the construction of a draft genetic map using the genotype calls predicted by NGSEP on the cassava NxA population

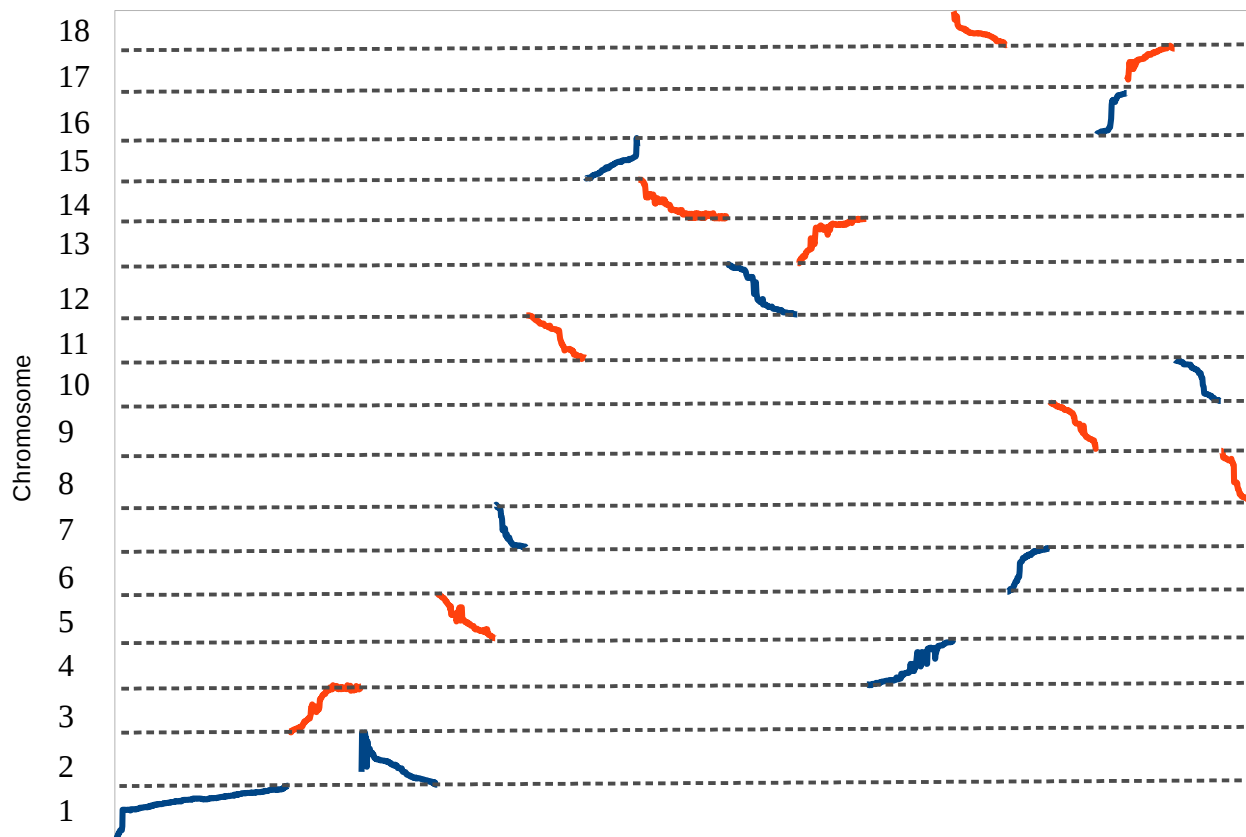

**Supplementary figure 3.** Schematic of the development of the common bean MAGIC population

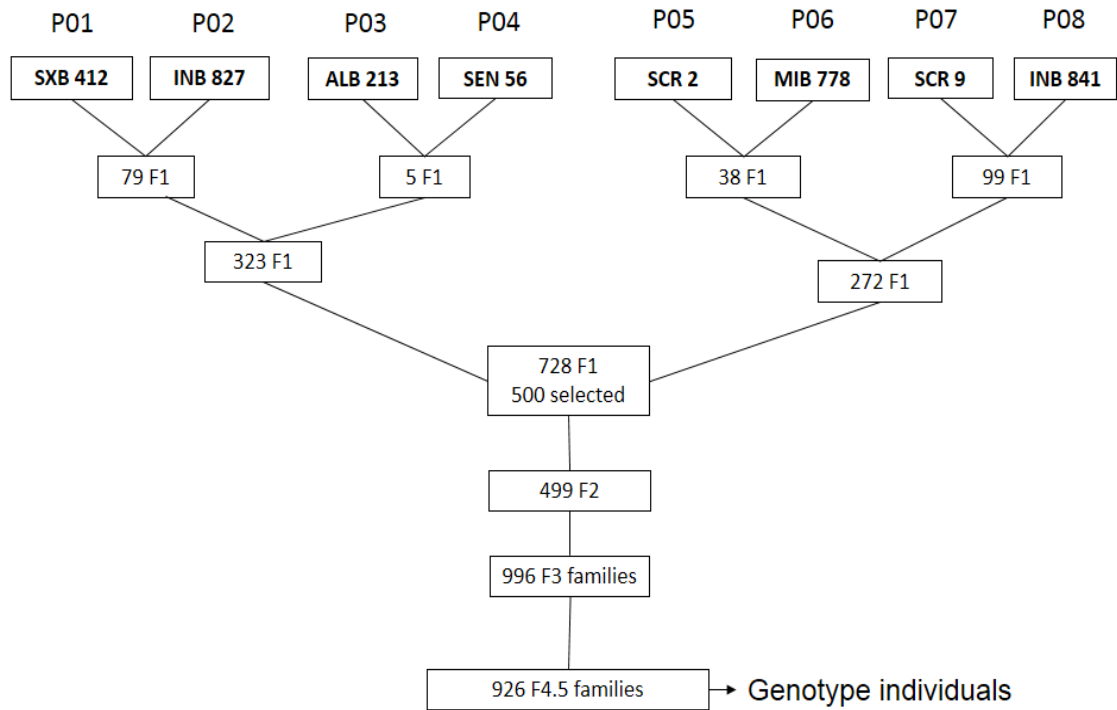

Supplement: 12864_2016_2827_MOESM1_ESM.pdf [file 12864_2016_2827_MOESM1_ESM.pdf]
